# Supplementary material for: Crosstalk between the chloroplast protein import and SUMO systems revealed through genetic and molecular investigation in Arabidopsis
Source: eLife. 2021 Sep 2;10:e60960. doi: 10.7554/eLife.60960 (PMC8497055; doi:10.7554/eLife.60960)
Supplement: Source data 2. — Raw numerical data used to plot all graphs in the paper. [file elife-60960-supp2.xlsx]

## Sheet: Guide
Source data 2 guide
This file contains the raw data supporting the following figure panels:
Worksheet	Figure panel
1	Figure 1B
2	Figure 1D
3	Figure 1E
4	Figure 1F
5	Figure 1H
6	Figure 1J
7	Figure 1K
8	Figure 1 – Supplement 1B
9	Figure 1 – Supplement 1D
10	Figure 2B
11	Figure 2D
12	Figure 2F
13	Figure 2H
14	Figure 4B
15	Figure 4D
16	Figure 4F
17	Figure 4H
18	Figure 4 – Supplement 1B
19	Figure 5 – Supplement 3B

## Sheet: 1. Figure 1B
Genotype	Chlorophyll concentration (nmol chl/mg fresh weight)
WT	1.09608
WT	1.29108
WT	1.28162
WT	1.18266
WT	1.46008
WT	1.21627
WT	1.39069
ppi1	0.451275
ppi1	0.380643
ppi1	0.390182
ppi1	0.457366
ppi1	0.433192
ppi1	0.4717
ppi1	0.597067
ppi1 sce1-4	0.721922
ppi1 sce1-4	0.719475
ppi1 sce1-4	0.721922
ppi1 sce1-4	0.776636
ppi1 sce1-4	0.685588
ppi1 sce1-4	0.692792
ppi1 sce1-4	0.539412

## Sheet: 2. Figure 1D
Genotype	Chloroplast plan area (µm2)
WT	8.06733
WT	9.68389
WT	8.455
ppi1	2.65456
ppi1	4.02789
ppi1	3.21311
ppi1 sce1-4	5.33822
ppi1 sce1-4	6.72167
ppi1 sce1-4	5.78644

## Sheet: 3. Figure 1E
Genotype	No. stacked lamellae/granum
WT	6.51173
WT	8.16667
WT	6.88889
ppi1	1.72222
ppi1	2.46111
ppi1	2.41667
ppi1 sce1-4	4.55556
ppi1 sce1-4	4.36111
ppi1 sce1-4	3.66667

## Sheet: 4. Figure 1F
Genotype	No. interconnections/granum
WT	4.88869
WT	7.16667
WT	3.55556
ppi1	1.11111
ppi1	1.55
ppi1	1.16667
ppi1 sce1-4	2.88889
ppi1 sce1-4	2.4
ppi1 sce1-4	1.86111

## Sheet: 5. Figure 1H
Genotype	Chlorophyll concentration (nmol chl/mg fresh weight)
WT	1.49705
WT	1.31647
WT	1.08436
WT	1.35174
WT	1.22243
WT	1.13453
WT	1.26279
WT	1.27533
WT	1.19484
WT	0.981475
ppi1	0.347028
ppi1	0.543763
ppi1	0.484123
ppi1	0.3544
ppi1	0.561307
ppi1	0.439188
ppi1	0.554702
ppi1	0.417356
ppi1 siz1 -4	0.827846
ppi1 siz1 -4	0.948187
ppi1 siz1 -4	1.13751
ppi1 siz1 -4	1.05244
ppi1 siz1 -4	1.10195
ppi1 siz1 -4	1.00113
ppi1 siz1 -4	1.22552
ppi1 siz1 -4	1.05822

## Sheet: 6. Figure 1J
Genotype	Abundance of Toc159 (relative to WT, normalised to Tic110)
WT	1
WT	1
WT	1
WT	1
ppi1	0.250174
ppi1	0.123845
ppi1	0.315146
ppi1	0.288472
ppi1 siz1-4	0.309623
ppi1 siz1-4	0.303236
ppi1 siz1-4	0.478509
ppi1 siz1-4	0.454317
ppi1 siz1-5	0.39002
ppi1 siz1-5	0.303236
ppi1 siz1-5	0.54039
ppi1 siz1-5	0.522583

## Sheet: 7. Figure 1K
Genotype	Abundance of Toc75 (relative to WT, normalised to Tic110)
WT	1
WT	1
WT	1
ppi1	0.127508
ppi1	0.171423
ppi1	0.152768
ppi1 siz1-4	0.23396
ppi1 siz1-4	0.292261
ppi1 siz1-4	0.418985
ppi1 siz1-5	0.314484
ppi1 siz1-5	0.444402
ppi1 siz1-5	0.63232

## Sheet: 8. Figure 1 - Supplement 1B
Genotype	Chlorophyll concentration (nmol chl/mg fresh weight)
WT	1.04381
WT	1.19789
WT	1.07271
WT	1.27848
WT	0.931732
WT	1.25967
WT	1.11967
WT	1.27848
WT	1.19789
WT	1.09608
WT	1.39396
WT	1.41365
WT	1.24099
WT	1.56879
WT	1.38091
WT	0.8461
WT	0.809763
WT	1.48692
WT	1.63855
WT	1.43347
WT	1.16752
WT	1.16752
WT	1.07853
WT	1.44675
WT	1.03235
WT	1.34851
WT	1.23479
WT	1.01527
WT	1.42024
WT	1.47347
sce1-4	1.31647
sce1-4	1.19789
sce1-4	1.13155
sce1-4	1.204
sce1-4	1.15548
sce1-4	0.975892
sce1-4	1.02664
sce1-4	0.970323
sce1-4	1.25967
sce1-4	1.29108
sce1-4	0.909988
sce1-4	1.27219
sce1-4	1.14348
sce1-4	1.10784
sce1-4	0.861883
sce1-4	1.05533
sce1-4	1.22243
sce1-4	0.970323
sce1-4	1.09608
sce1-4	1.13751
sce1-4	0.888468
sce1-4	1.14947
sce1-4	1.3101
sce1-4	0.920832
sce1-4	1.31647
sce1-4	1.3101
sce1-4	0.804628
sce1-4	1.31647
sce1-4	1.05533
sce1-4	1.19179
ppi1	0.361828
ppi1	0.373075
ppi1	0.3181
ppi1	0.3181
ppi1	0.373075
ppi1	0.246427
ppi1	0.339712
ppi1	0.293523
ppi1	0.246427
ppi1	0.419323
ppi1	0.376852
ppi1	0.214467
ppi1	0.300475
ppi1	0.276388
ppi1	0.339712
ppi1	0.3181
ppi1	0.223908
ppi1	0.384448
ppi1	0.239923
ppi1	0.3544
ppi1	0.347028
ppi1	0.328843
ppi1	0.347028
ppi1	0.311008
ppi1	0.321667
ppi1	0.259603
ppi1	0.246427
ppi1	0.384448
ppi1	0.230272
ppi1	0.286627
ppi1 sce1-4	0.3921
ppi1 sce1-4	0.496672
ppi1 sce1-4	0.427227
ppi1 sce1-4	0.365563
ppi1 sce1-4	0.509347
ppi1 sce1-4	0.369312
ppi1 sce1-4	0.459403
ppi1 sce1-4	0.517867
ppi1 sce1-4	0.435187
ppi1 sce1-4	0.411475
ppi1 sce1-4	0.350707
ppi1 sce1-4	0.361828
ppi1 sce1-4	0.443203
ppi1 sce1-4	0.443203
ppi1 sce1-4	0.415392
ppi1 sce1-4	0.459403
ppi1 sce1-4	0.496672
ppi1 sce1-4	0.443203
ppi1 sce1-4	0.399808
ppi1 sce1-4	0.463488
ppi1 sce1-4	0.3921
ppi1 sce1-4	0.500883
ppi1 sce1-4	0.619872
ppi1 sce1-4	0.419323
ppi1 sce1-4	0.395947
ppi1 sce1-4	0.447232
ppi1 sce1-4	0.369312
ppi1 sce1-4	0.467587
ppi1 sce1-4	0.407572
ppi1 sce1-4	0.3544

## Sheet: 9. Figure 1 - Supplement 1D
Genotype	Chlorophyll concentration (nmol chl/mg fresh weight)
WT	0.948187
WT	0.539412
WT	0.539412
WT	0.535075
WT	1.08436
WT	1.02664
WT	1.08436
WT	0.729283
WT	0.522148
WT	0.5136
siz1-4	0.724372
siz1-4	0.754048
siz1-4	0.872475
siz1-4	0.6477
siz1-4	0.948187
siz1-4	0.6016
siz1-4	0.877792
siz1-4	0.804628
siz1-4	0.893827
siz1-4	0.561307
siz1-5	0.861883
siz1-5	0.8461
siz1-5	0.592548
siz1-5	0.820075
siz1-5	0.583552
siz1-5	0.610708
siz1-5	0.719475
siz1-5	0.638368
siz1-5	0.759043
siz1-5	0.479968
ppi1	0.2832
ppi1	0.276388
ppi1	0.276388
ppi1	0.311008
ppi1	0.290068
ppi1	0.2497
ppi1	0.325248
ppi1	0.262932
ppi1	0.296992
ppi1	0.300475
ppi1 siz1-4	0.3921
ppi1 siz1-4	0.415392
ppi1 siz1-4	0.380643
ppi1 siz1-4	0.373075
ppi1 siz1-4	0.343363
ppi1 siz1-4	0.423268
ppi1 siz1-4	0.307483
ppi1 siz1-4	0.423268
ppi1 siz1-4	0.388267
ppi1 siz1-4	0.411475
ppi1 siz1-5	0.415392
ppi1 siz1-5	0.459403
ppi1 siz1-5	0.467587
ppi1 siz1-5	0.384448
ppi1 siz1-5	0.583552
ppi1 siz1-5	0.407572
ppi1 siz1-5	0.447232
ppi1 siz1-5	0.395947
ppi1 siz1-5	0.439188
ppi1 siz1-5	0.484123

[truncated: 10 more sheets: 10. Figure 2B, 11. Figure 2D, 12. Figure 2F, 13. Figure 2H, 14. Figure 4B, 15. Figure 4D, 16. Figure 4F, 17. Figure 4H, 18. Figure 4 - Supplement 1B, 19. Figure 5 - Supplement 3B]
